# Supplementary material
Source: PubMed Central journal article supplement (PMC3067621)
Supplement: supp_193_6_1385__1.pdf [file supp_193_6_1385__1.pdf]

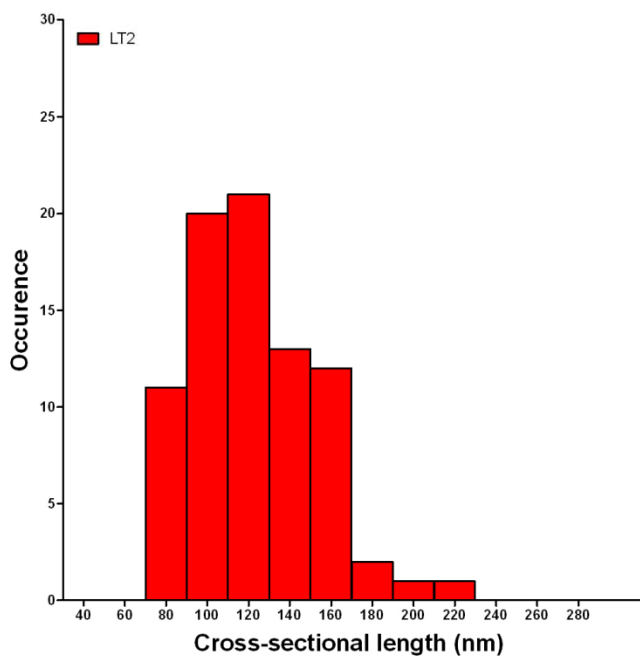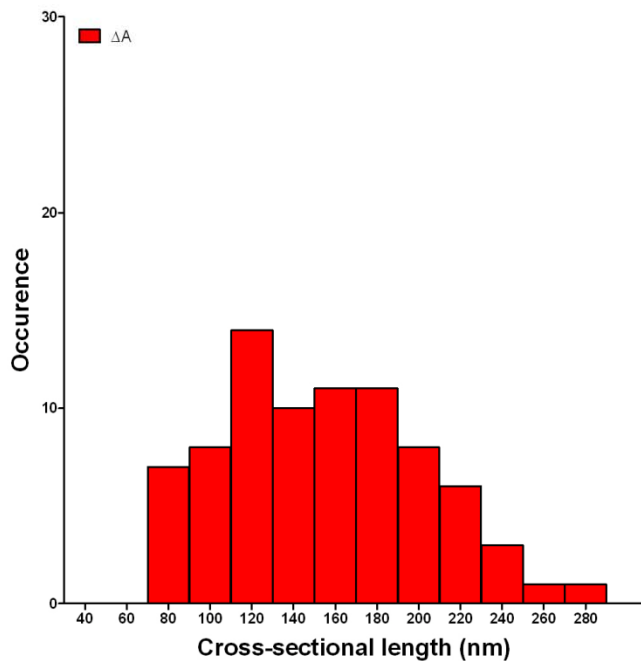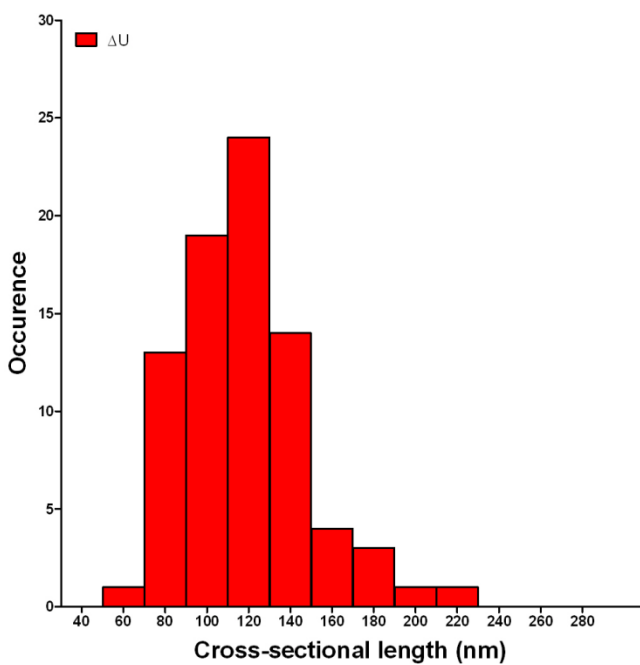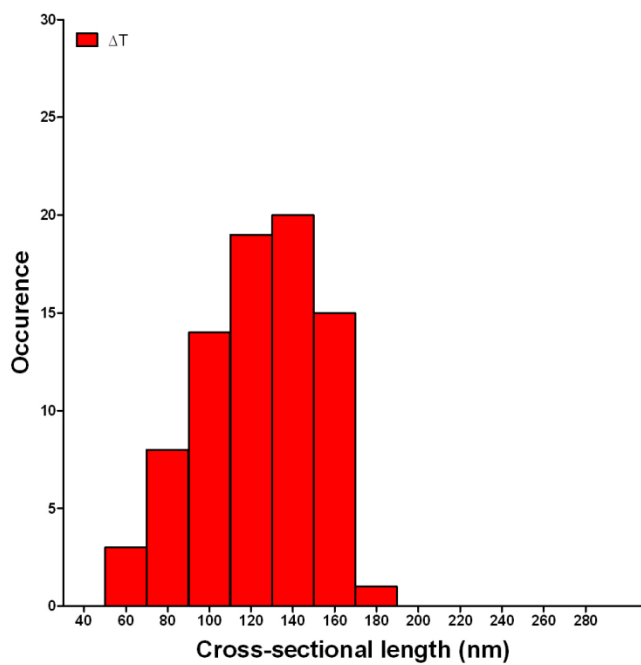

Figure S1. Size distributions of MCPs from wild-type *Salmonella* (LT2) and strains with a *pduA*, *pduU* or *pduT* deletion mutation ( $\Delta A$ ,  $\Delta U$  and  $\Delta T$ ). Each MCP was measured twice, once on the longest axis and then at 90° to the longest axis. Each data point in the distributions above represent 1 measurement. Points were grouped into 20 nm bins.

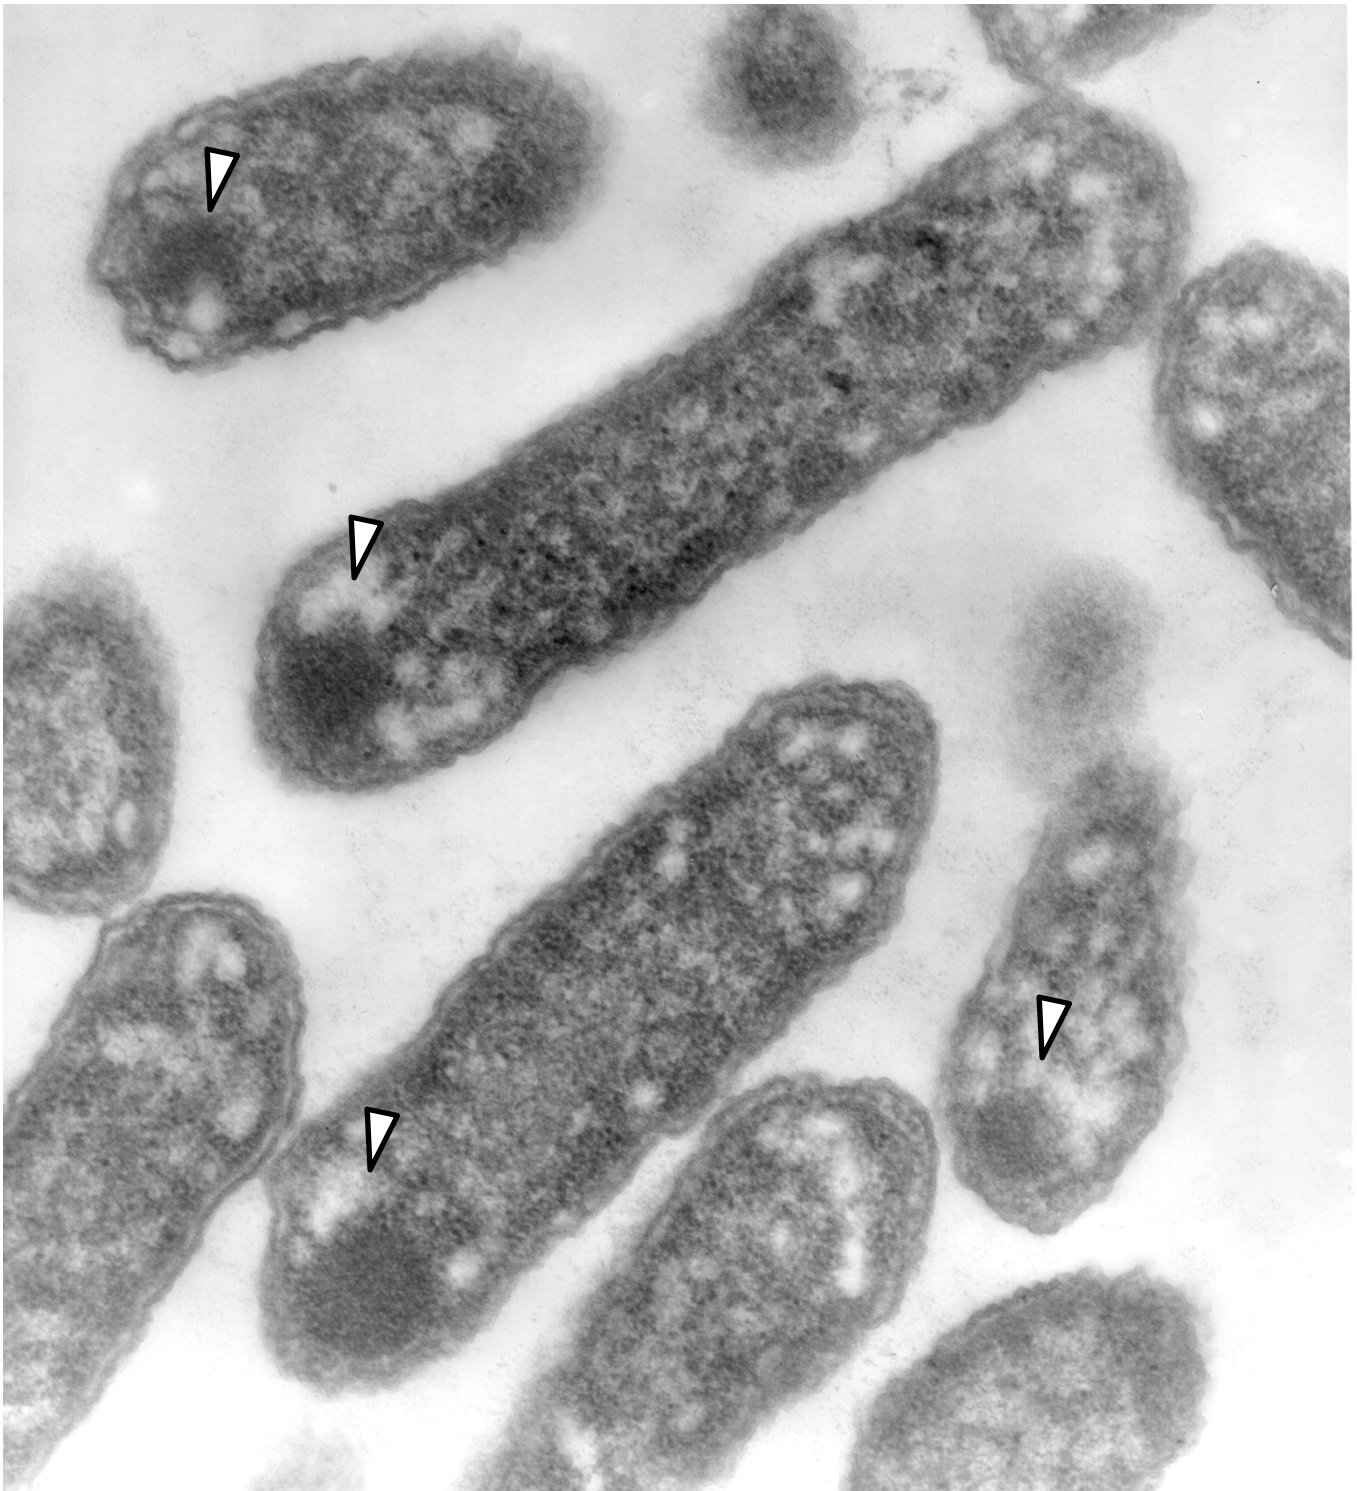

Figure S2. Electron micrograph of *pduBB'* deletion mutant. Triangles point to the amorphous polar bodies formed by these strains. The bodies are understood to be composed MCP components. They are not present in wild-type.

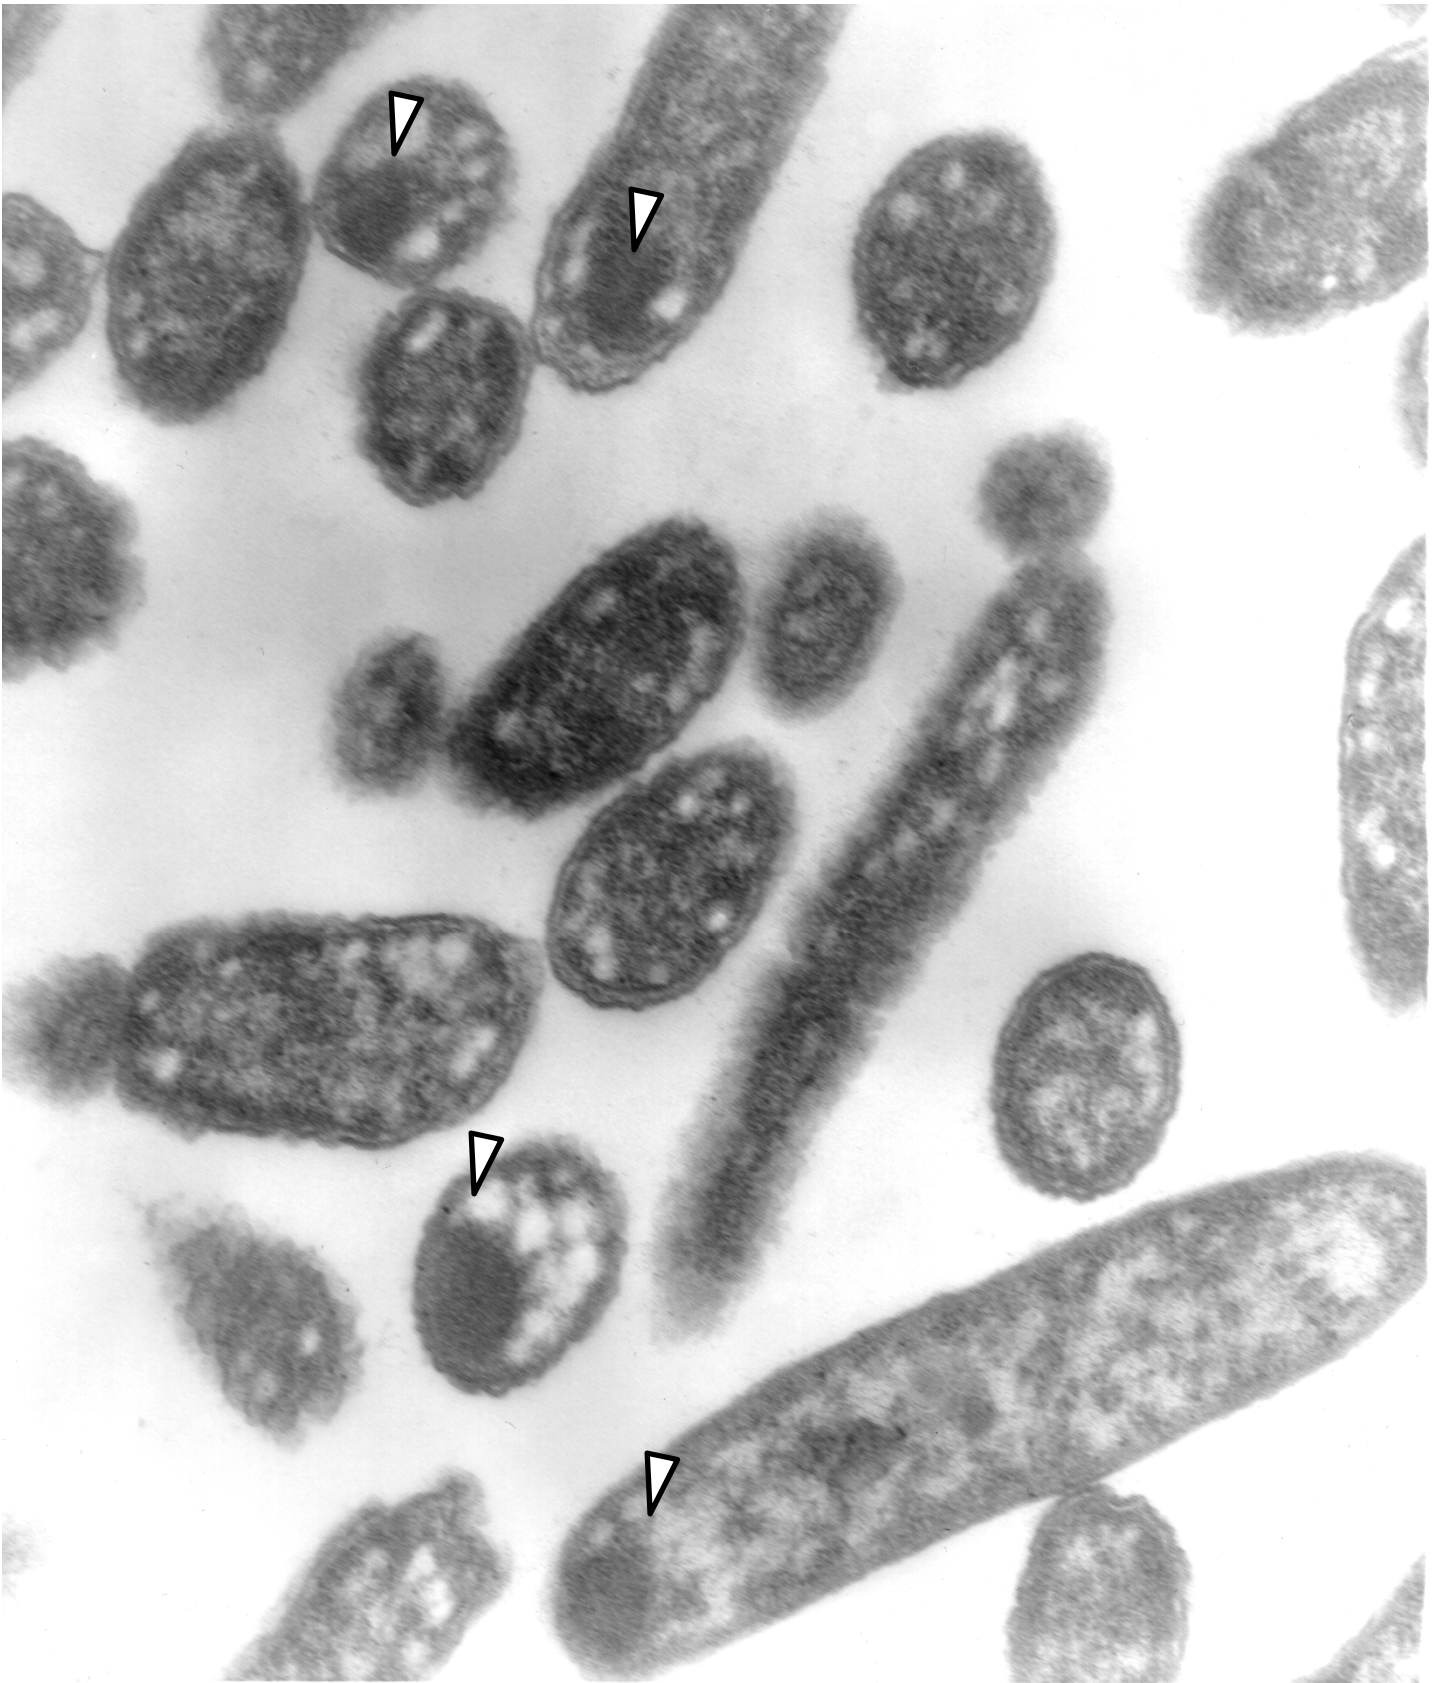

Figure S3. Electron micrograph of *pduBB'* deletion mutant. Triangles point to the amorphous polar bodies formed by these strains. The bodies are understood to be composed MCP components. They are not present in wild-type.

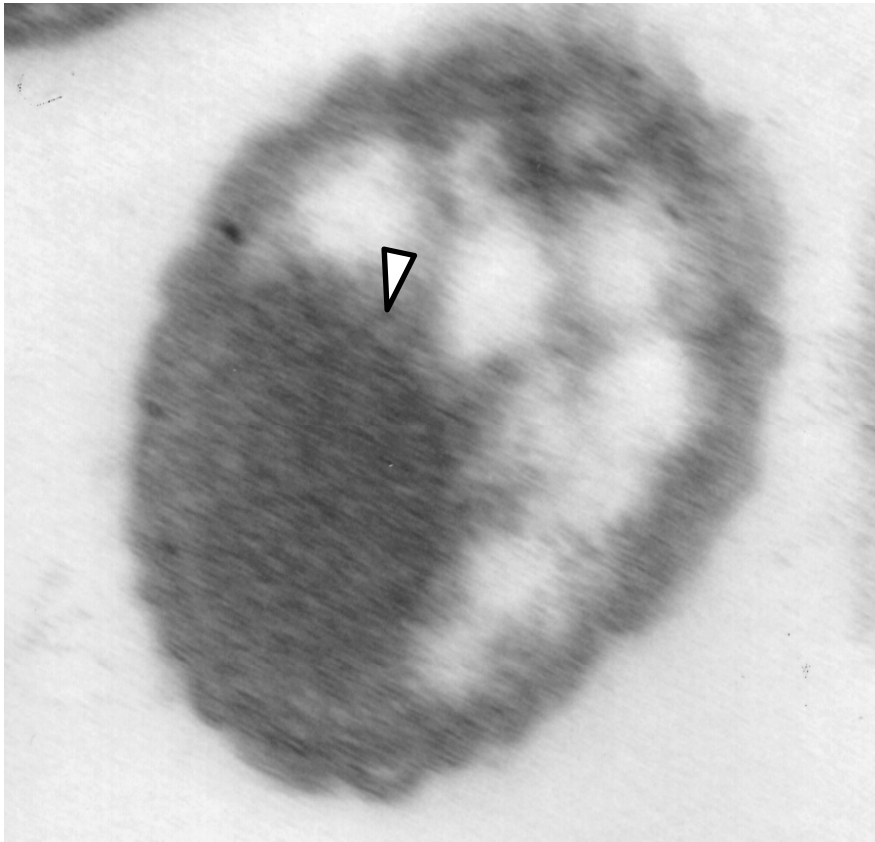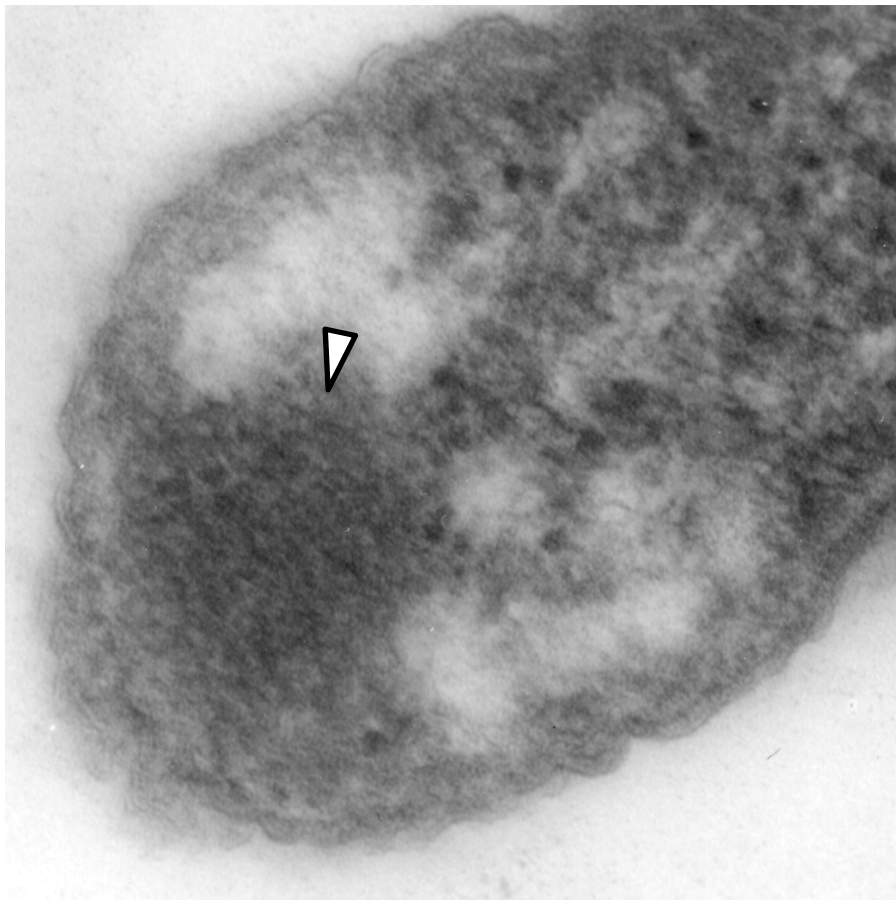

Figure S4. Enlargements of the polar bodies formed by the *pduBB'* deletion mutant.

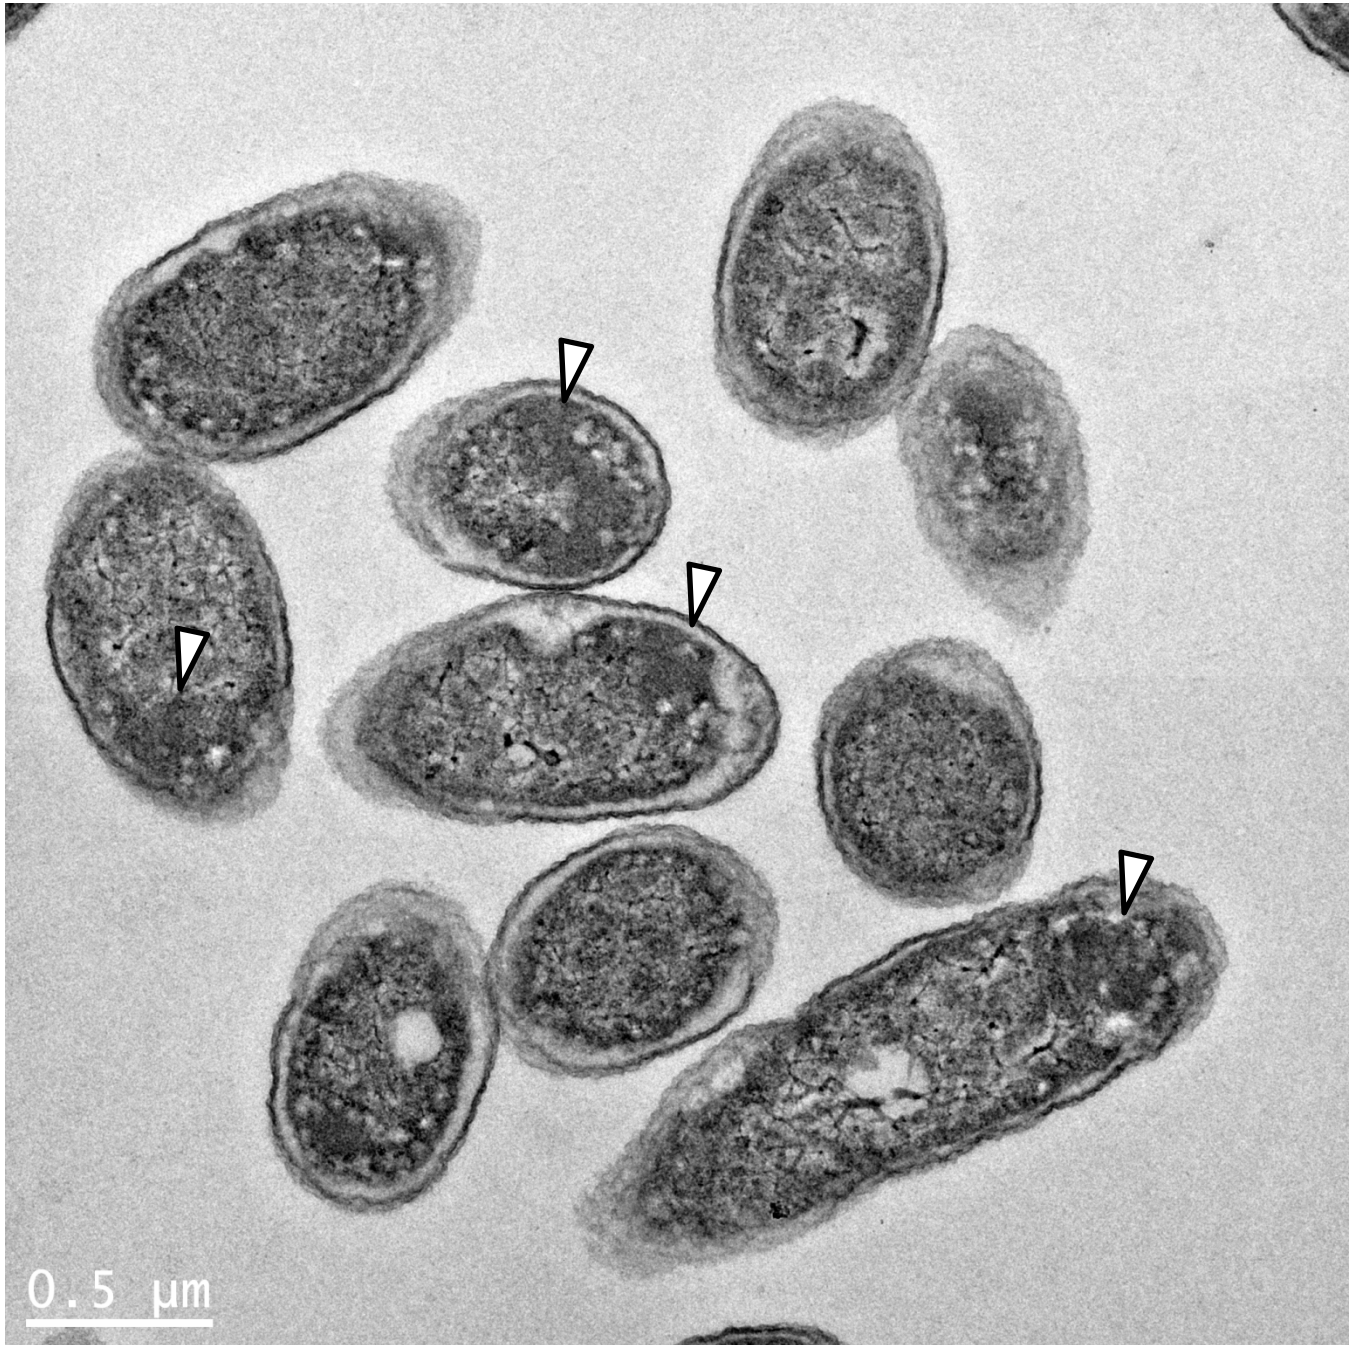

Figure S5. Aggregates of MCPs observed in *pduK* deletion mutants. Although it is difficult to see in this image, under the scope these aggregates appear to consist of groups of MCPs with their shells intact.

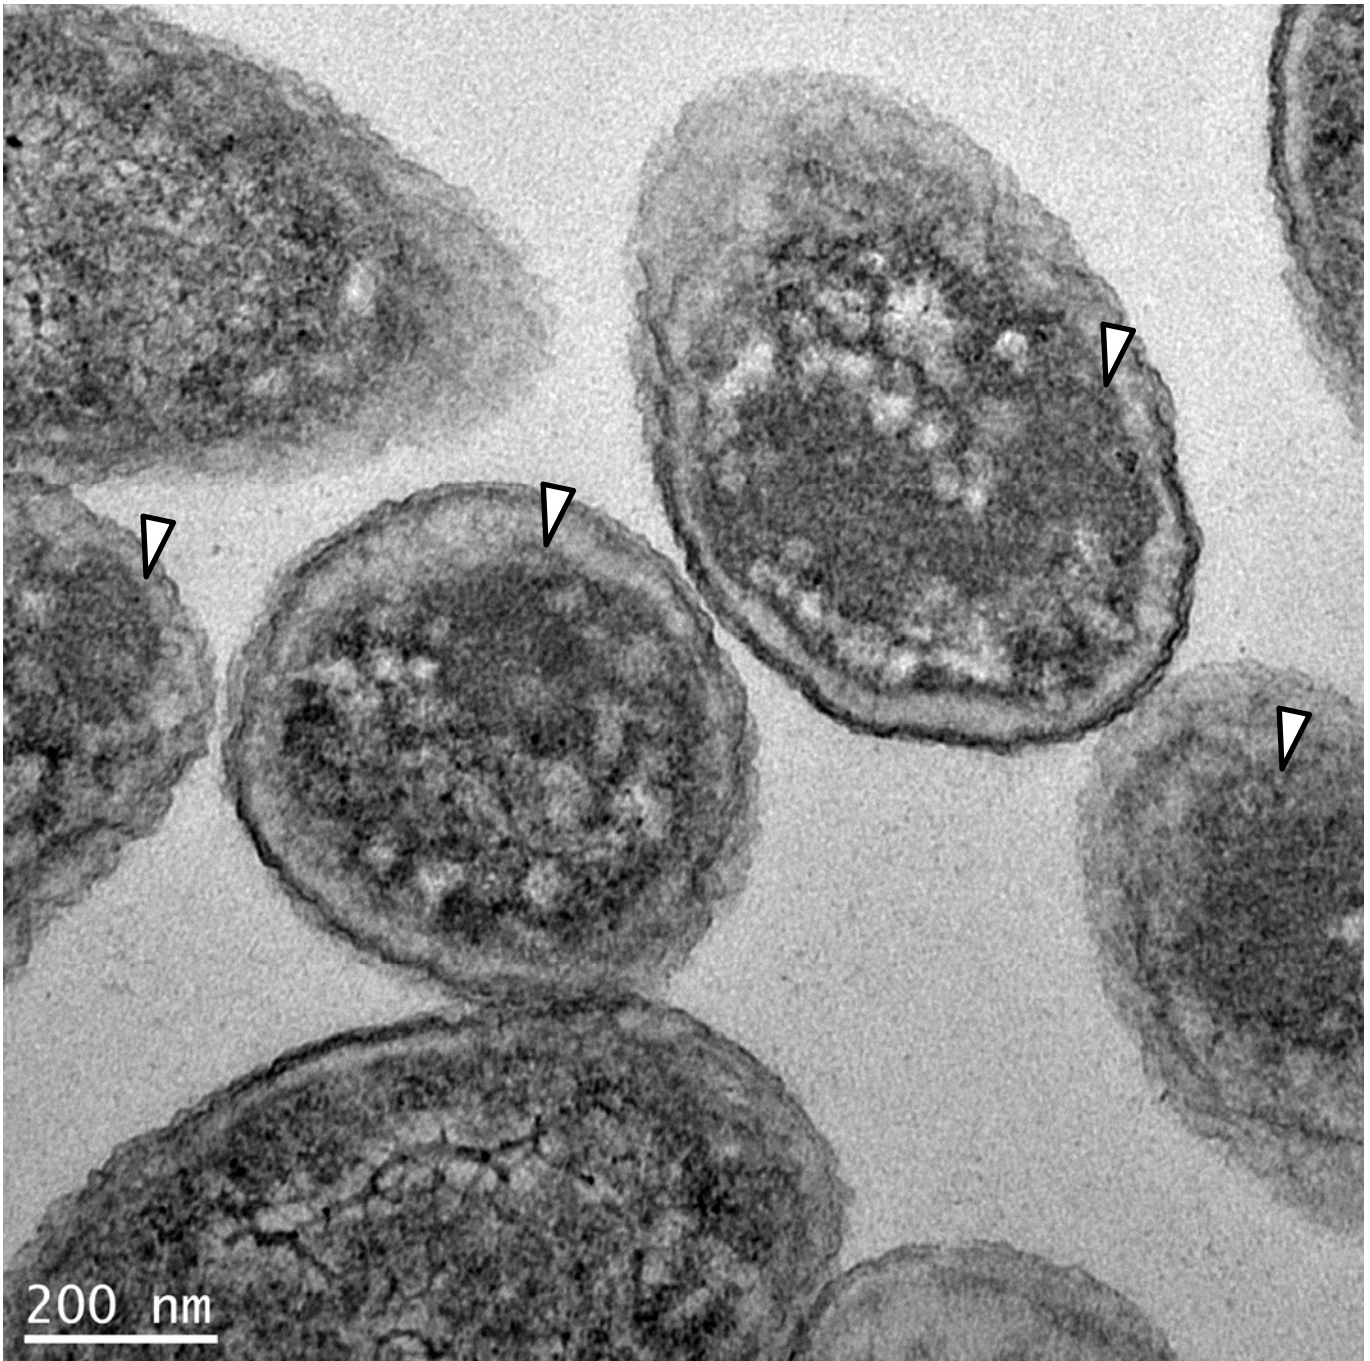

Figure S6. Aggregates of MCPs observed in *pduK* deletion mutants. Although it is difficult to see in this image, under the scope these aggregates appear to consist of groups of MCPs with their shells intact.

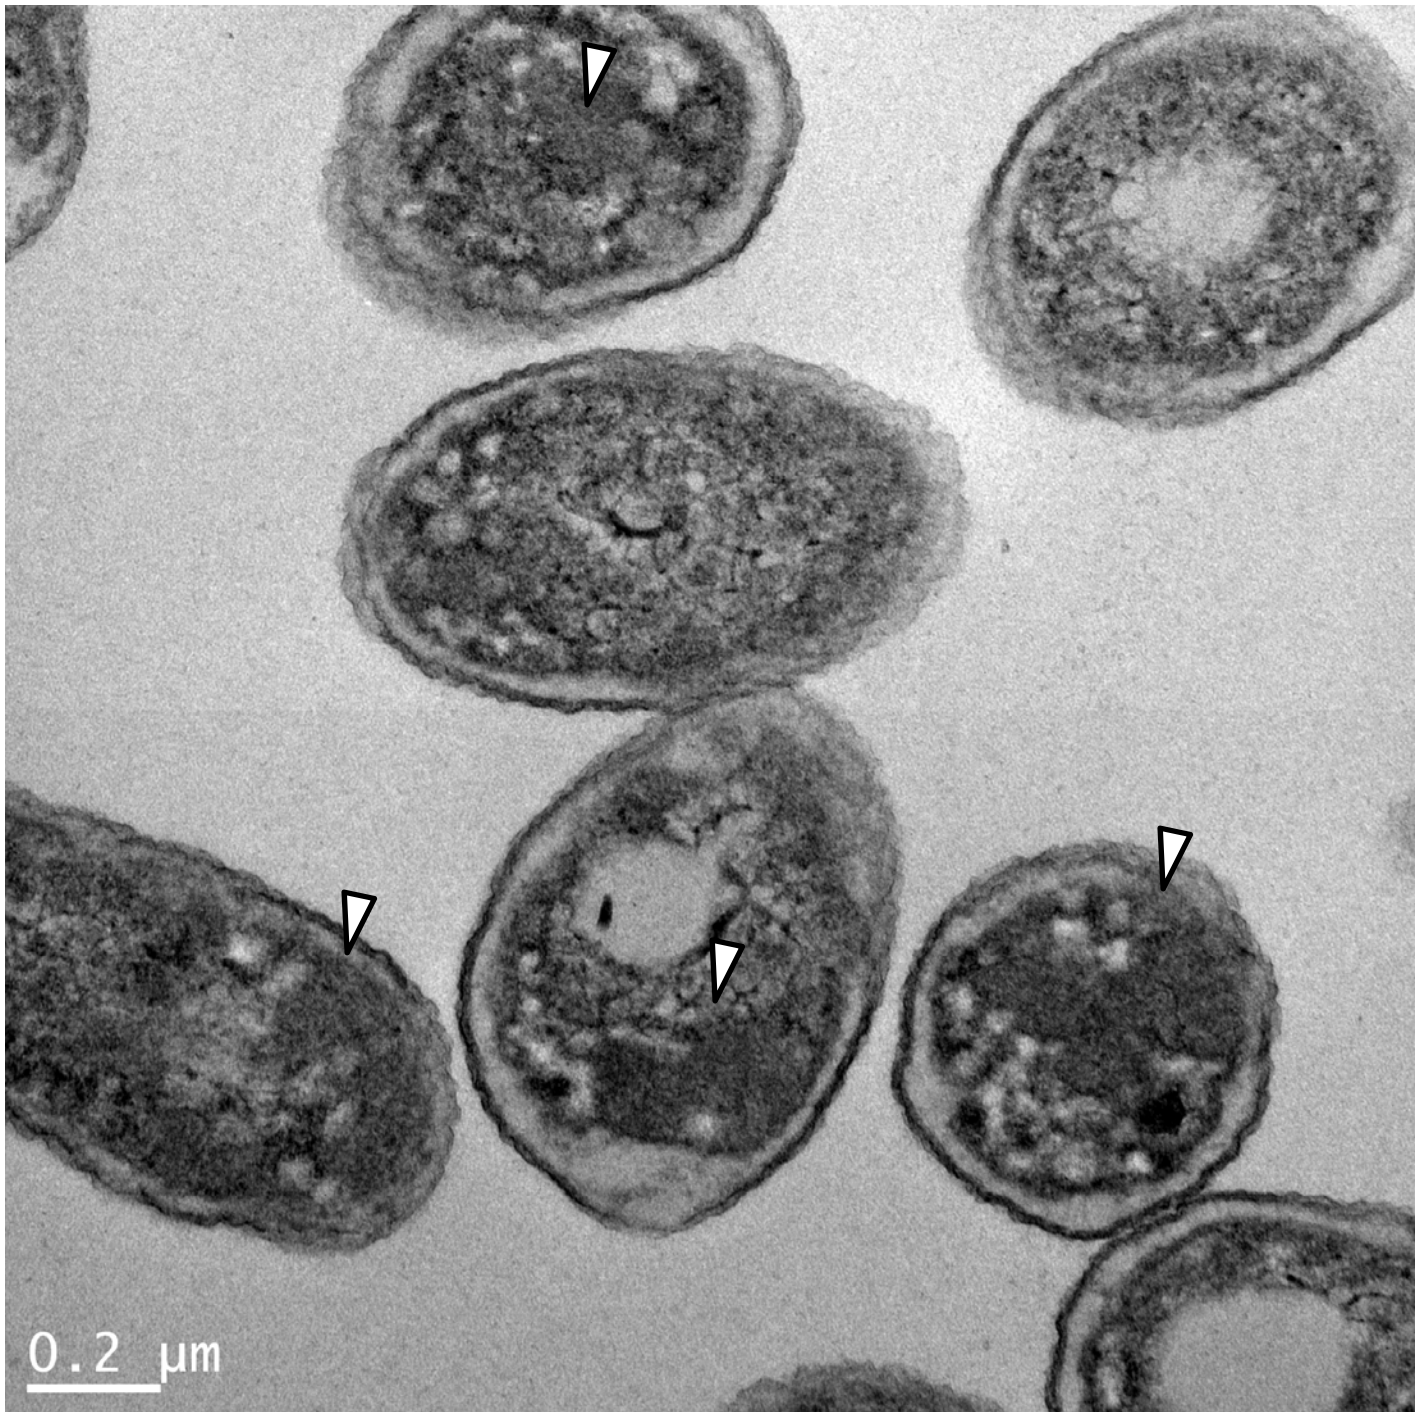

Figure S7. Aggregates of MCPs observed in *pduK* deletion mutants. Although it is difficult to see in this image, under the scope these aggregates appear to consist of groups of MCPs with their shells intact.

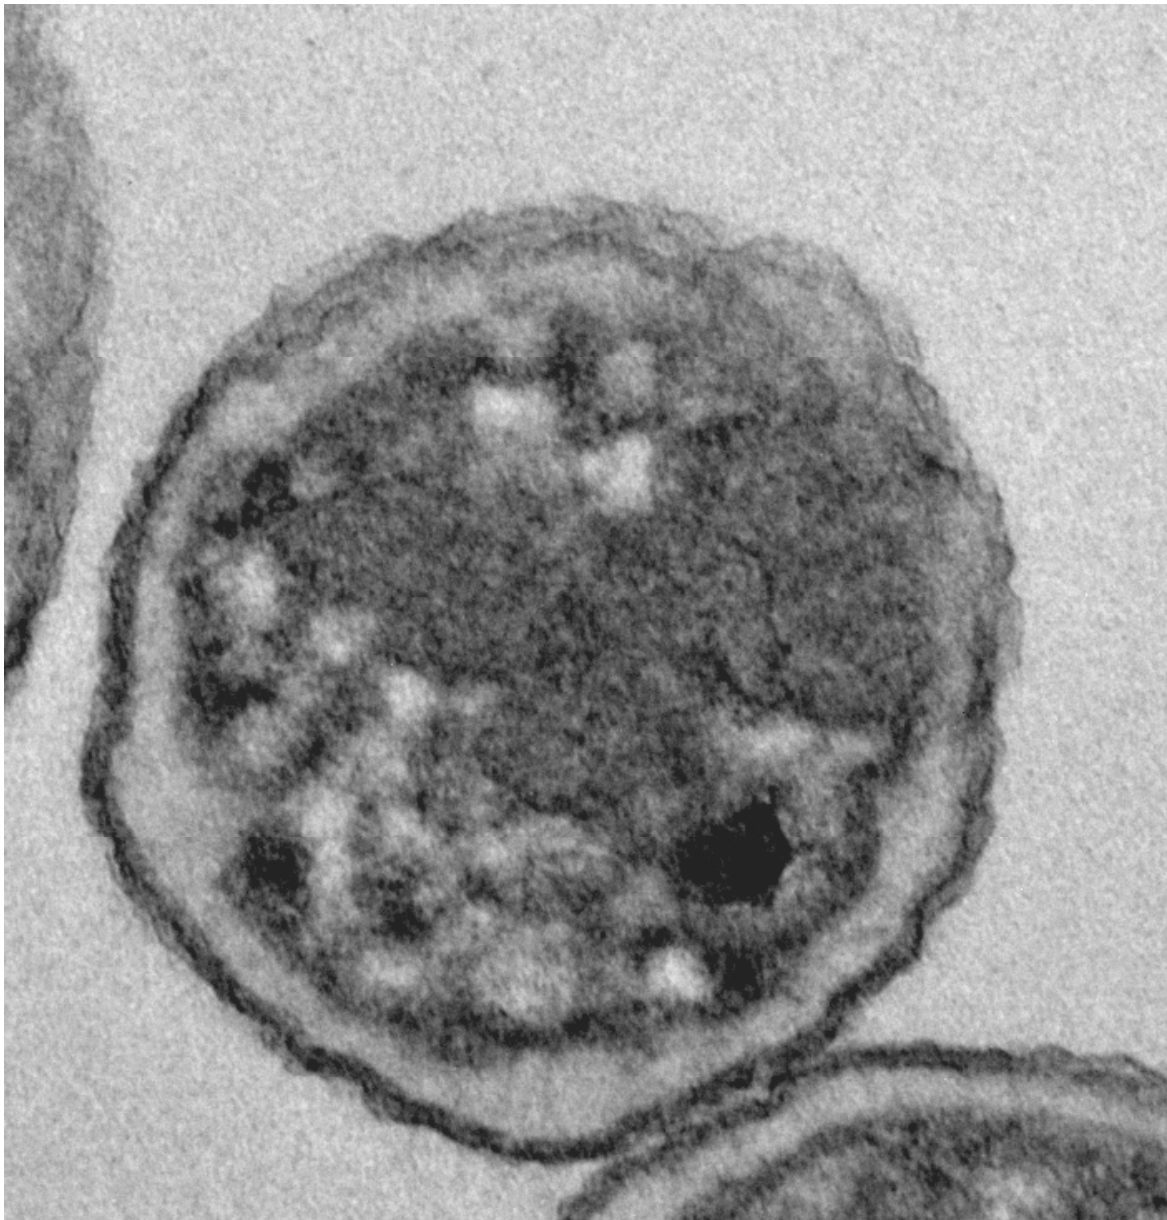

Figure S8. Enlargement of aggregates of MCPs observed in *pduK* deletion mutants. Although it is difficult to see in this image, under the scope these aggregates appear to consist of groups of MCPs with their shells intact.



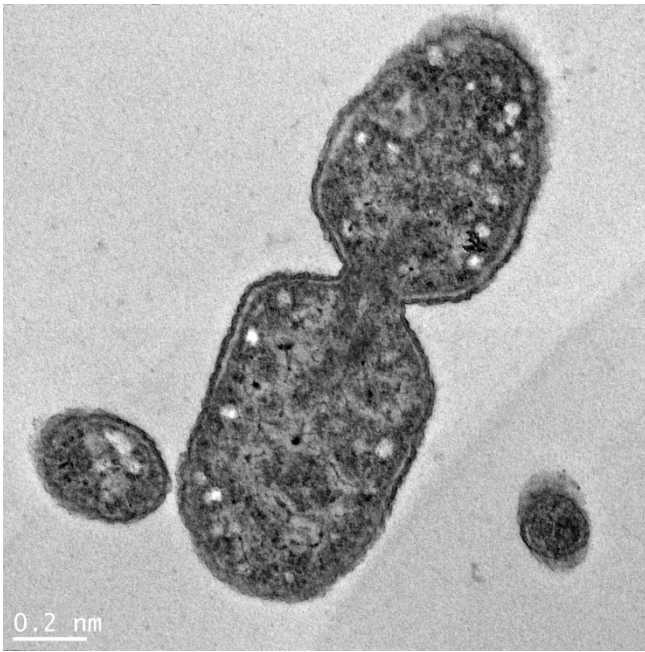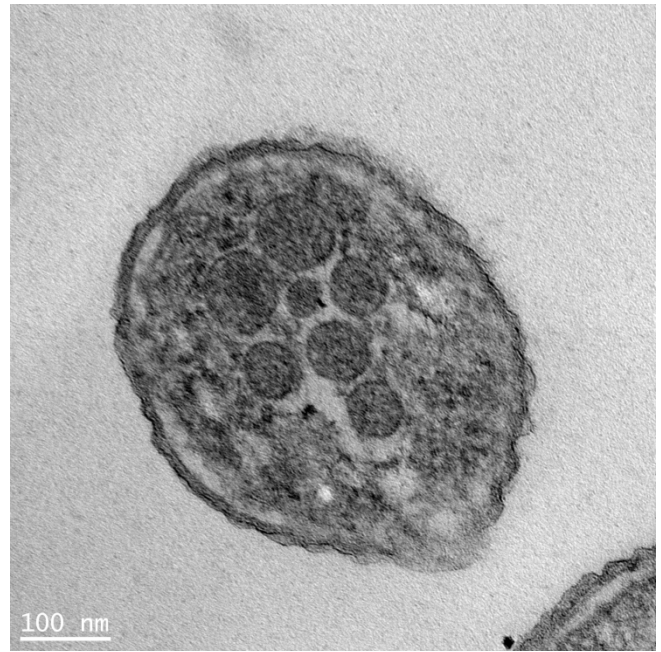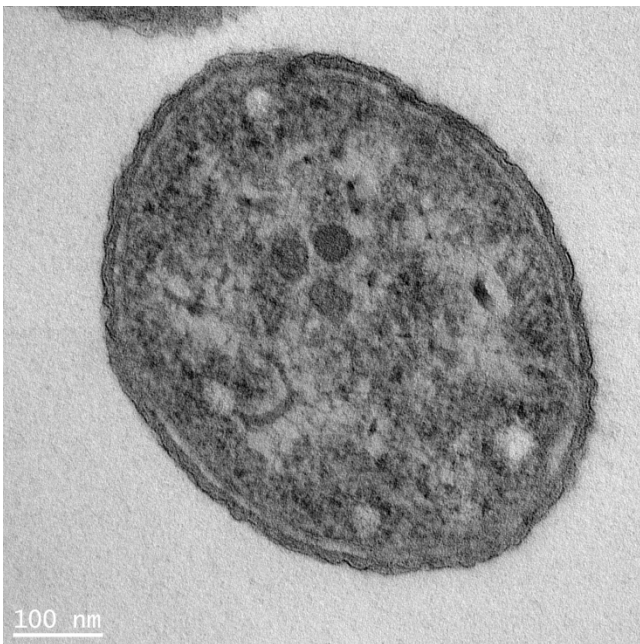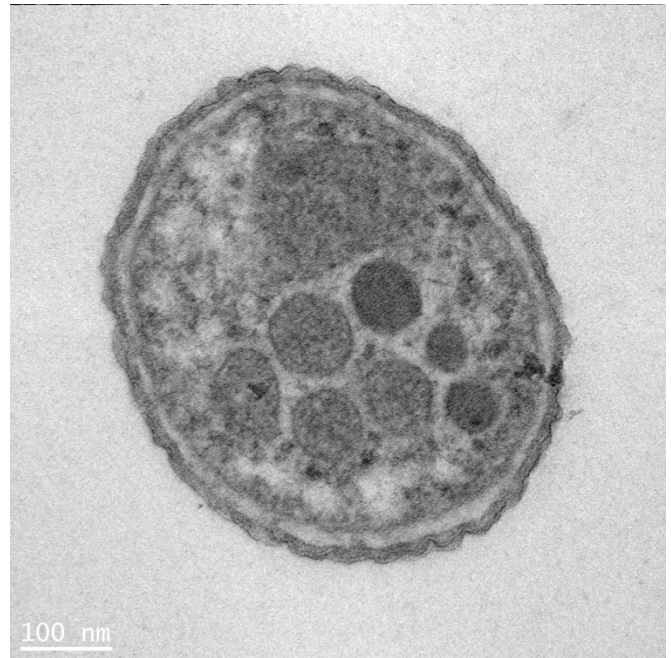

Figure S9. Electron micrographs of MCPs observed in *pduN* deletion mutants. The size and shape of the MCPs varies widely. The images shown were selected to be representative.

### Full-length Western Blot of PduN

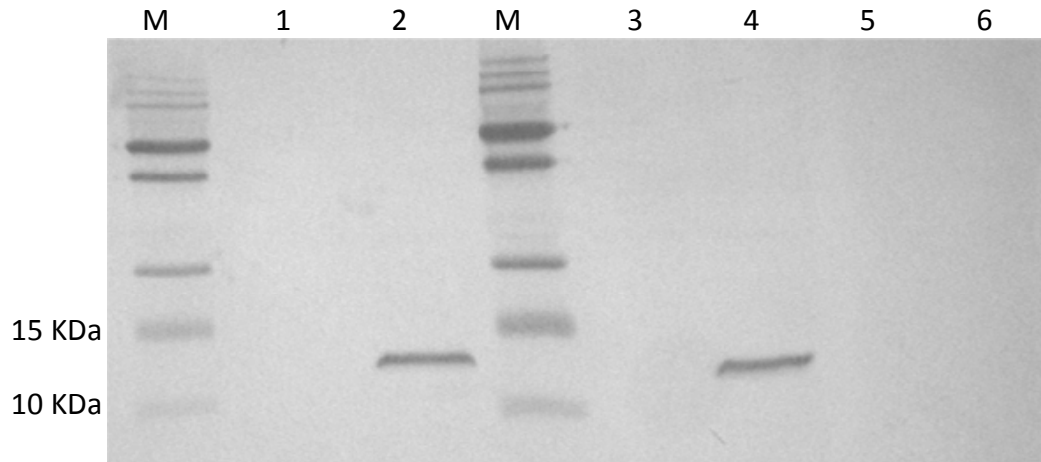

Figure S10. Western blot for PduN. 10  $\mu$ g of protein was run in lanes 1-6. Western blots were performed as described in material and methods.

M: molecular mass markers.

Lane 1: crude extract of *E. coli* BE100/pTA925 (no insert)

Lane 2: crude extract of *E. coli* BE100/pTA925-pduN

Lane 3: crude extract of wild-type *Salmonella*.

Lane 4: purified Pdu MCP of wild-type *Salmonella*.

Lane 5: crude extract of a *pduN* deletion mutant

Lane 6: purified Pdu MCP of a *pduN* deletion mutant.
